# Supplementary material
Source: Elsevier journal article supplement (https://www.sciencedirect.com/science/article/pii/S2530064421000948)
Supplement: mmc1 [file S2530064421000948:mmc1.xlsx]

## Sheet: Hoja1
Species	Crown	Head	Cheek	Mantle	Primaries	Wing_coverts	Back	Rump	Tail	Belly	Breast	Throat	Dimorph	Polymorphic	Iridescense
Agelaioides badius	brown	brown	brown	brown	rufous	brown-rufous	brown	brown	black	brown	brown	brown	0	0	0
Agelasticus thilius	black	black	black	black	black	black_yellow	black	black	black	black	black	black	1	0	0
Anumbius annumbi	black_rufous	brown	white_black	black_brown	black_brown	black_brown	black_brown	brown	black_white	white	brown	white_black	0	0	0
Anthus correndera	brown	brown	brown	brown_white	brown_white	brown_white	brown_white	brown	brown_white	white_brown	white_brown	white	0	0	0
Anas flavirostris	brown	brown	brown	brown	black_brown	brown	brown	brown	brown	brown	black_brown	brown	0	0	0
Asio flammeus	brown_white	brown_white	brown_white	brown_white	brown_white	brown_white	brown_white	brown	brown_white	white	brown_white	brown_white	0	0	0
Athene cunicularia	brown_white	brown_white	whte_brown	brown_white	brown_white	brown_white	brown_white	brown_white	brown_white	white	white_brown	brown_white	0	0	0
Chloris chloris	green_yellow	green_yellow	grey	green	grey_yellow	green_grey	green	green_yellow	black_yellow	green_yellow	green_yellow	green_yellow	1	0	0
Chlorostilbon lucidus	green	green	green	green	blue	green	green	green	blue	green	green	blue	1	0	30
Cinclodes fuscus	brown	brown	brown	brown	black_brown	brown	brown	brown	brown	brown	grey_brown	white_brown	0	0	0
Colaptes campestris	black	black	yellow	yellow	black_white	black_white	black_white	white_black	black	white_black	white_black	yellow	1	0	0
Columba livia	grey	grey	grey	green	grey_black	grey	grey	grey	grey_black	puprle_green	purple	grey	1	1	10
Colaptes melanochloros	black	red	white_red	black_yellow	black_yellow	black_yellow	black_yellow	black_yellow	black	black_yellow	black_yellow	black_yellow	1	0	0
Columbina picui	grey	brown	brown	brown	white_black	grey_black	brown	brown	brown_white	grey	white	grey	1	0	0
Elanus leucurus	gray	white	white	grey	grey	black	grey	white	white	white	white	white	0	0	0
Elaenia parvirostris	olive_white	olive	olive	olive	brown_white	brown_white	olive	olive	olive	white	white	white	0	0	0
Embernagra platensis	grey	grey	grey	grey	green	green	green_black	grey	grey	grey	grey	grey	0	0	0
Falco femoralis	grey	grey	white_black	grey	grey	grey	grey	grey	black_white	white	rufous_black	white	1	0	0
Falco sparverius	grey	black_brown	white_black	red_black	blue_black	blue_black	red_black	red	red_black	white	white_black	white	1	0	0
Furnarius rufus	brown	brown	brown	brown	brown	brown	brown	brown	rufous	white	brown	white	0	0	0
Guira guira	orange	orange	yellow	brown_white	brown_white	brown_white	white	white	black_white	white	white_brown	white_brown	0	0	0
Hirundo rustica	blue	blue	blue	blue	black	blue	blue	blue	black	orange	white	rufous	0	0	0
Hymenops perspicillata	black	black	black	black	white	black	black	black	black	black	black	black	1	0	0
Leucohloris albicollis	green	green	green	green	black	green	green	green	black	white	black	white	0	0	0
Leistes loyca	black	black_browm	black	black_brown	black-brown	black_brown	black_brown	black_brown	black_brown	black_brown	red	red	1	0	0
Leistes superciliaris	black	black	black	black	black	black_red	black	black	black	black	red	red	1	0	0
Machetornis rixosus	grey_red	grey	grey	olive	brown	brown	brown	brown	brown	yellow	yellow	white	0	0	0
Mimus saturninus	brown	brown	whte_black	grey	brown_white	brown_white	grey	brown	brown	white	white	white	0	0	0
Molothrus bonariensis	black_blue	black_blue	black	black_blue	black	black_blue	black_blue	black_blue	black	black_blue	black_blue	black	1	0	0
Molothrus rufoaxillaris	black	black	black	black	black	black	black	black	black	black	black	black	0	0	0
Myipsita monachus	grey_green	green	green	green	blue	green	green	green	green_blue	green	grey	grey	0	0	0
Passer domesticus	grey	grey	white	black_brown	black_brown	brown_white	black_brown	grey	black	grey	grey	black	1	0	0
Patagioenas maculosa	grey	grey	grey	grey	brown_white	brown_white	grey	grey	grey_black	grey	grey	grey	0	0	0
Patagioenas picazuro	pink_purple	pink_purple	pink_purple	brown	grey	grey_white	grey	grey	grey_black	grey	pink_purple	pink_purple	0	0	10
Phalcoboenus chimango	brown	brown	brown	brown	grey	brown	brown	grey	grey	brown	brown	brown	0	0	0
Pipraeidea bonarienis	blue	blue	blue	black	blue_black	blue_black	black	yellow	black	yellow	yellow	blue	1	0	0
Pitangus sulphuratus	black_yellow	black_white	black	brown	brown	brown	brown	brown	brown	yellow	yellow	white	0	0	0
Plegadis chihi	rufous	rufous	rufous	rufous	green	rufous	rufous	rufous	green	rufous	rufous	rufous	0	0	50
Progne chalybea	blue	blue	blue	blue	black	blue	blue	blue	black	white	white	grey	1	0	0
Progne elegans	blue	blue	blue	blue	black	blue	blue	blue	black	black	black	black	1	0	0
Progne tapera	brown	brown	brown	brown	brown	brown_white	brown	brown	brown	white	white	white	0	0	0
Pseudoleistes virescnes	brown	brown	brown	brown	brown	brown_yellow	brown	brown	brown	yellow	yellow_brown	brown	0	0	0
Rhynchotus rufescens	black_red	black_red	balck_rufous	black_brown	rufous	black_brown	black_brown	black_brown	black_brown	brown_black	brown_black	white	0	0	0
Rupornis magnirostris	brown	brown	brown	brown	brown	brown	brown	brown	rufous_black	brown_white	brown_white	brown	0	0	0
Setophaga pitiayumi	blue	blue	blue	blue	blue	blue	olive	blue	blue	yellow	yellow	yellow	0	0	0
Serpophaga subcristata	grey	grey	grey	grey	black_white	black_white	grey	grey	grey	olive	grey_white	white	0	0	0
Sicalis flaveola	yellow	yellow	yellow	yellow_black	black_yellow	brown_yellow	brown_yellow	yellow	black_yellow	yellow	yellow	yellow	1	0	0
Sicalis luteola	olive	olive	olive	olive_black	olive_brown	olive_brown	olive_brown	olive	olive	yellow	yellow	yellow	1	0	0
Sporophila caerulescens	grey	grey	grey	grey	brown	brown	grey	grey	grey	white	white_black	black_white	1	0	0
Spinus magellanicus	black	black	black	yellow	black_yellow	black_yellow	yellow	yellow	black_yellow	yellow	yellow	black	1	0	0
Tachycineta leucorrhoa	blue	blue	blue	blue	black	black	blue	white	black	white	white	white	0	0	0
Troglodytes aedon	brown	brown	brown	brown	black_brown	black_brown	brown	rufous	black_brown	white	brown	white	0	0	0
Turdus rufiventris	brown	brown	brown	brown	brown	brown	brown	brown	brown	orange	brown	brown_white	0	0	0
Tyrannus melancholicus	grey	grey	grey	olive	brown	brown	olive	brown	brown	yellow	yellow	grey	0	0	0
Tyrannus savana	black_yellow	black	black	grey	black	grey	grey	black	black	white	white	white	0	0	0
Vanellus chilensis	grey	grey	grey	grey	grey	green	grey	grey	white_black	white	black	grey_black	0	0	10
Zenaida auriculata	blue	grey	grey_black	pink	grey_black	grey	grey	grey	grey	grey	grey	grey	1	0	10
Zonotrichia capensis	black_grey	black_grey	black_grey	rufous	brown	brown_black	brown	brown	brown	white	grey	white	0	0	0
