# Supplementary material
Source: Elsevier journal article supplement (https://www.sciencedirect.com/science/article/pii/S2530064421000948)
Supplement: mmc2 [file S2530064421000948:mmc2.xlsx]

## Sheet: Hoja1
Species	Color	Dimorph	Polymorphic	Iridescense
Agelaioides badius	brown	0	0	0
Agelasticus thilius	black	1	0	0
Anumbius annumbi	black_brown	0	0	0
Anthus correndera	brown	0	0	0
Anas flavirostris	brown	0	0	0
Asio flammeus	brown_white	0	0	0
Athene cunicularia	brown_white	0	0	0
Chloris chloris	green_yellow	1	0	0
Chlorostilbon lucidus	green	1	0	30
Cinclodes fuscus	brown	0	0	0
Colaptes campestris	black	1	0	0
Columba livia	grey	1	1	10
Colaptes melanochloros	black_yellow	1	0	0
Columbina picui	brown	1	0	0
Elanus leucurus	white	0	0	0
Elaenia parvirostris	olive	0	0	0
Embernagra platensis	grey	0	0	0
Falco femoralis	grey	1	0	0
Falco sparverius	red	1	0	0
Furnarius rufus	brown	0	0	0
Guira guira	white	0	0	0
Hirundo rustica	blue	0	0	0
Hymenops perspicillata	black	1	0	0
Leucohloris albicollis	green	0	0	0
Leistes loyca	black_brown	1	0	0
Leistes superciliaris	black	1	0	0
Machetornis rixosus	brown	0	0	0
Mimus saturninus	brown	0	0	0
Molothrus bonariensis	black_blue	1	0	0
Molothrus rufoaxillaris	black	0	0	0
Myipsita monachus	green	0	0	0
Passer domesticus	grey	1	0	0
Patagioenas maculosa	grey	0	0	0
Patagioenas picazuro	pink_purple	0	0	10
Phalcoboenus chimango	brown	0	0	0
Pipraeidea bonarienis	blue	1	0	0
Pitangus sulphuratus	brown	0	0	0
Plegadis chihi	rufous	0	0	50
Progne chalybea	blue	1	0	0
Progne elegans	blue	1	0	0
Progne tapera	brown	0	0	0
Pseudoleistes virescnes	brown	0	0	0
Rhynchotus rufescens	black_brown	0	0	0
Rupornis magnirostris	brown	0	0	0
Setophaga pitiayumi	blue	0	0	0
Serpophaga subcristata	grey	0	0	0
Sicalis flaveola	yellow	1	0	0
Sicalis luteola	olive	1	0	0
Sporophila caerulescens	grey	1	0	0
Spinus magellanicus	yellow	1	0	0
Tachycineta leucorrhoa	blue	0	0	0
Troglodytes aedon	brown	0	0	0
Turdus rufiventris	brown	0	0	0
Tyrannus melancholicus	brown	0	0	0
Tyrannus savana	black	0	0	0
Vanellus chilensis	grey	0	0	10
Zenaida auriculata	grey	1	0	10
Zonotrichia capensis	brown	0	0	0
